# Supplementary material
Source: PubMed Central journal article supplement (PMC4701053)
Supplement: NIHMS731187-supplement.pdf [file NIHMS731187-supplement.pdf]

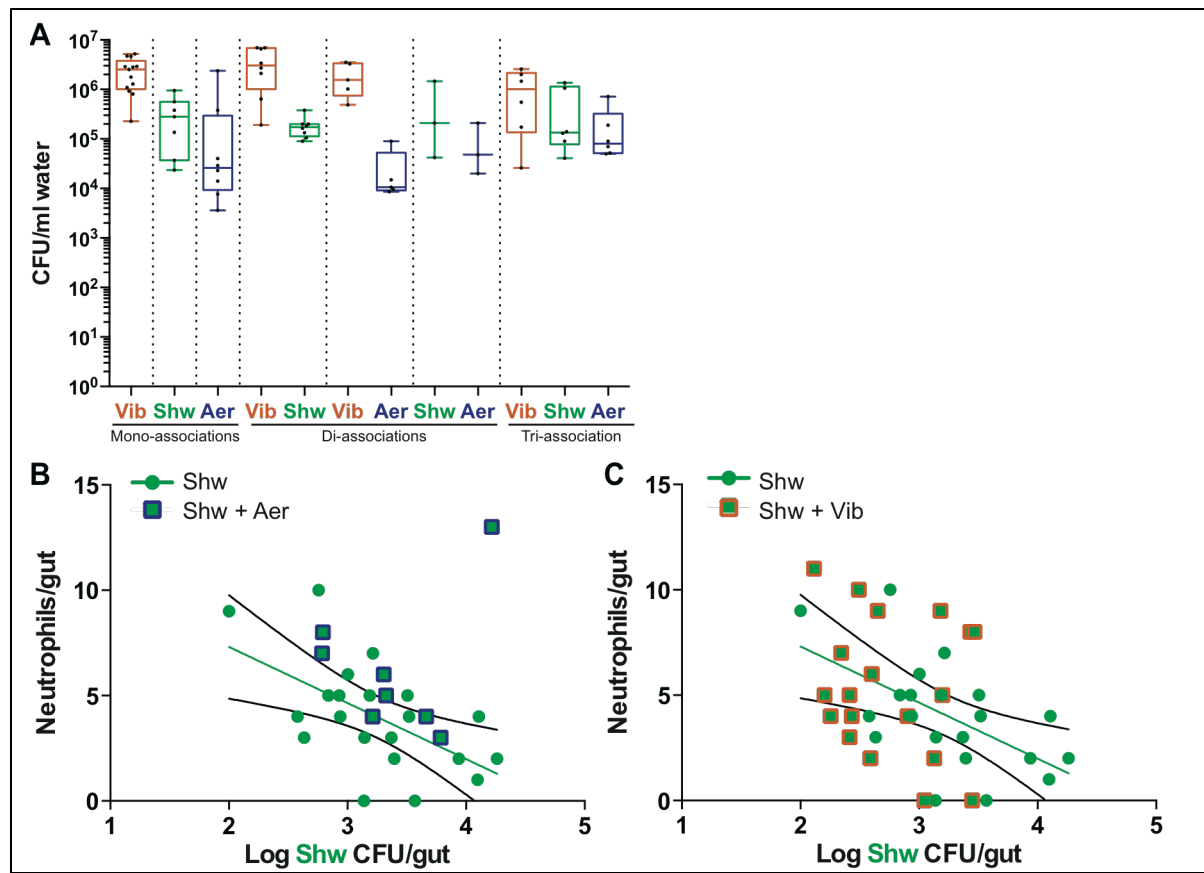

1 **Figure S1. Microbial di-associations reveal complex dynamics between microbes.**

2 **(Related to Figure 2) (A)** Each species was inoculated into the fish media at  $10^6$  CFU/ml at  
 3 4dpf. At 6 dpf, when the fish were examined, a sample was taken to examine the concentration  
 4 of bacteria in the media at that time. Concentrations of *Vibrio* (red), *Shewanella* (green), and  
 5 *Aeromonas* (blue) in the fish media (EM) are unaltered comparing the mono-associations  
 6 (single columns, left), to the di-associations (double columns, middle), and the tri-association  
 7 (triple columns, right). This suggests that dynamics between colonization of these species in the  
 8 host are host-associated. *Shewanella* abundance in di-association with *Aeromonas* **(B)** or *Vibrio*  
 9 **(C)** appears to maintain the relationship with intestinal neutrophil influx that it establishes in  
 10 mono-association (green circles). The linear relationship for each di-association is not significant  
 11 and is also not significantly different from the linear relationship for the mono-association. For  
 12 each di-association, one representative independent experiment is shown.

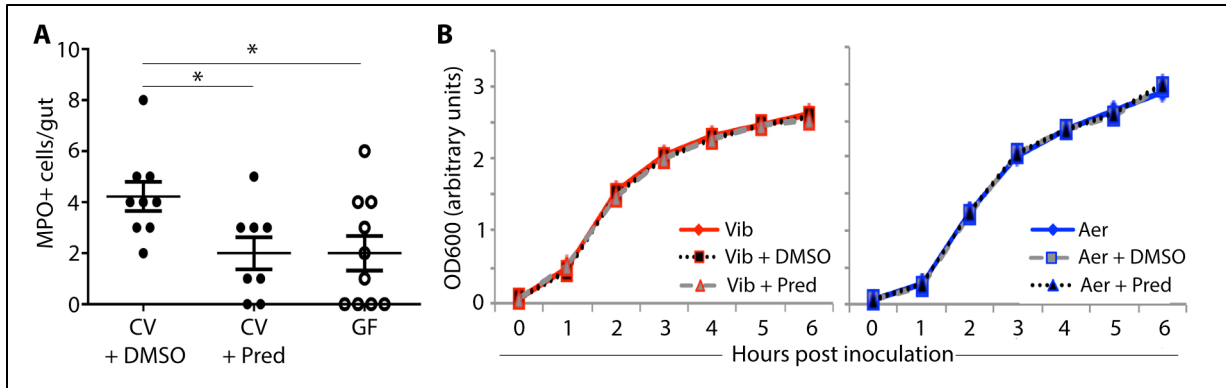

14

15 **Figure S2. Prednisolone does not affect *in vitro* growth (Related to Figure 3).** A. Treatment

16 of conventionally raised (CV) zebrafish with 25  $\mu\text{g}/\text{mL}$  prednisolone reduces intestinal neutrophil

17 influx. GF, germ-free. B. *In vitro* growth of *Vibrio* (left panel) or *Aeromonas* (right panel) is

18 unaffected by the presence of 25  $\mu\text{g}/\text{mL}$  prednisolone. DMSO, vehicle control.

19

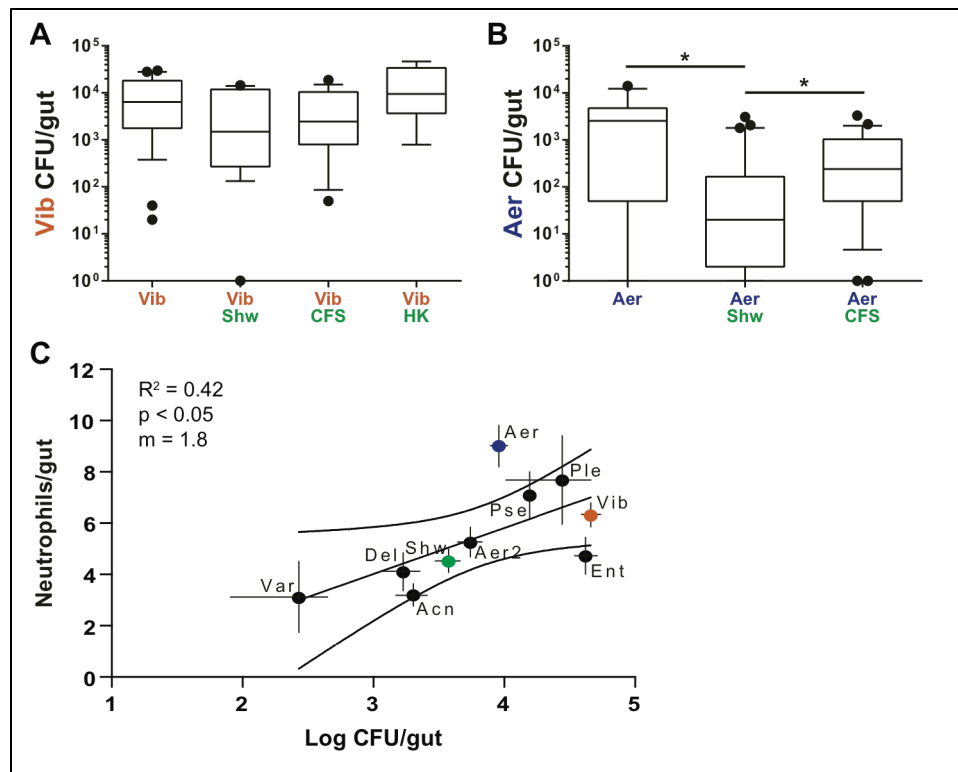

20

21 **Figure S3. Effects of *Shewanella* and *Shewanella* CFS on *Vibrio* and *Aeromonas* (Related**

22 **to Figure 4). A.** Co-inoculating *Vibrio* with either live *Shewanella*, *Shewanella* cell-free

23 supernatant (CFS), or heat-killed (HK) *Shewanella* does not change the abundance of *Vibrio* in

24 the intestine compared to a *Vibrio* mono-association. **B.** Co-inoculating *Aeromonas* with

25 *Shewanella* significantly reduces the abundance of *Aeromonas* compared to a mono-

26 association. Co-inoculating *Aeromonas* with *Shewanella* CFS does not change the abundance

27 of *Aeromonas* compared to a mono-association. \* $p < 0.05$ , Students T-test. **C.** (Related to

28 methods: Gnotobiotic zebrafish husbandry and microbiology). Linear correlation between the

29 average number of neutrophils per intestine and the logarithm of the average colony-forming

30 units (CFU) per intestine for all mono-associations (error bars in both directions are SEM).

31 Dashed line indicates the 95% confidence interval for the correlation. *Aeromonas* appears to be

32 an outlier and was included in statistical analysis. Aer, *Aeromonas* sp. 1; Vib, *Vibrio*; Ple,

33 *Plesiomonas*; Shw, *Shewanella*; Aer2, *Aeromonas* sp. 2; Ent, *Enterobacter*; Pse,

34 *Pseudomonas*; Del, *Delftia*; Var, *Variovorax*; Acn, *Acinetobacter*.

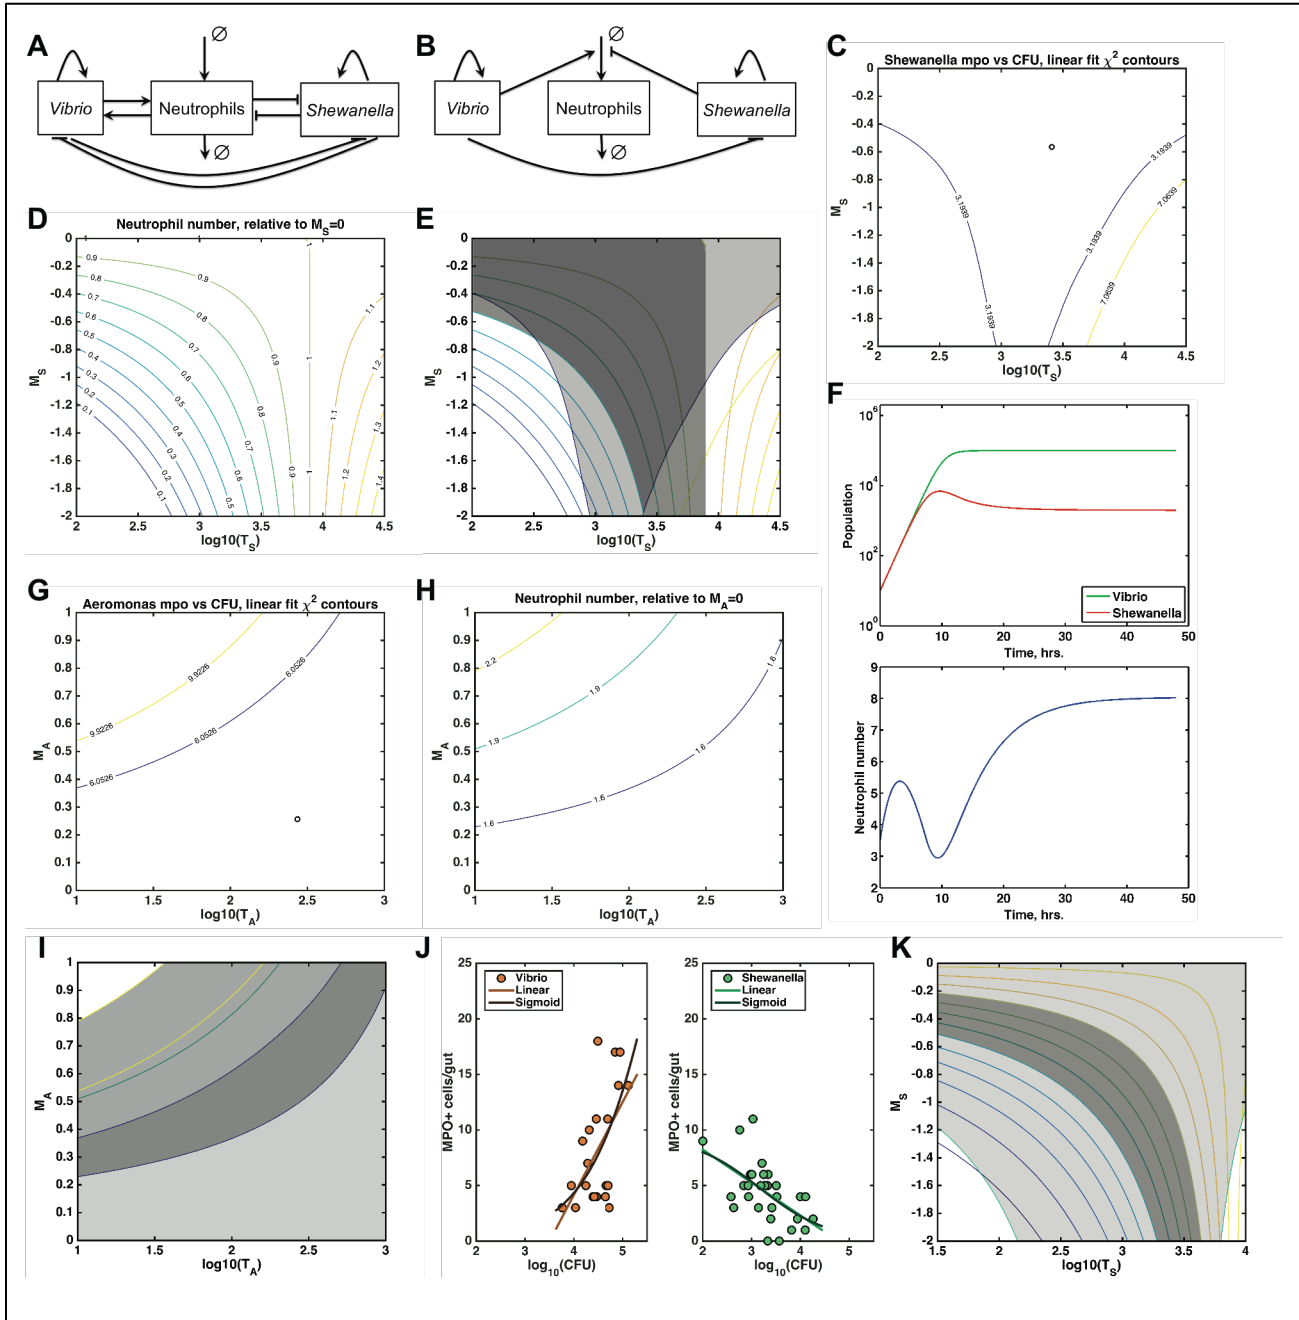

35 **Figure S4. Modeling bacterial/neutrophil interactions (Related to Experimental**  
 36 **procedures: Statistics and modeling).** **A.** Schematic interaction network. Interactions can be  
 37 positive (arrowheads) or negative (bars). Sources and sinks are depicted by  $\emptyset$ . For  
 38 concreteness we have illustrated a particular set that corresponds to observations described in  
 39 the main text. **B.** Simplified schematic interaction network. **C.** Goodness of fit for *Shewanella*  
 40 mono-association neutrophil number (linear fit). The circle indicates the best-fit parameters. The

41 contours are the 68% and 95% confidence intervals. **D.** Neutrophils: predicted suppression  
42 factor  $\zeta_{VS}$  for *Vibrio-Shewanella* di-association. **E.** *Shewanella*  $\rightarrow$  neutrophil parameter space.  
43 The dark shaded region is that for which the parameters in the additive interaction model are  
44 consistent with both the *Shewanella* mono- and di-association data. **F.** Simulated time series  
45 with “best-fit” model parameters. The upper graph shows the bacterial populations; the lower  
46 graph shows the neutrophil number. **G.** Goodness of fit for *Aeromonas* mono-association  
47 neutrophil number (linear fit). The circle indicates the best-fit parameters. The contours are the  
48 68% and 95% confidence intervals. **H.** Neutrophils: predicted enhancement factor,  $\zeta_{VA}$ , for  
49 *Vibrio-Aeromonas* di-association. **I.** *Aeromonas*  $\rightarrow$  neutrophil parameter space. The dark  
50 shaded region is that for which the parameters in the additive interaction model are consistent  
51 with both the *Aeromonas* mono- and di-association data. **J.** Neutrophil count vs. bacterial  
52 abundance (CFU), as in Figure 1, with fits to a model that is linear in  $\log(\text{CFU})$ , and a model that  
53 is sigmoidal in  $\log(\text{CFU})$ , for *Vibrio* (left) and *Shewanella* (right) mono-associations. **K.**  
54 *Shewanella*  $\rightarrow$  neutrophil parameter space for a sigmoidal bacterial  $\rightarrow$  neutrophil response  
55 function. The dark shaded region is that for which the parameters in the additive interaction  
56 model are consistent with both the *Shewanella* mono- and di-association data.

1 **Supplemental experimental materials**

2 *Gnotobiotic zebrafish husbandry*

3 Zebrafish embryos were derived germ free (GF) by the following procedure. Embryos 6  
4 hours post fertilization were soaked in 0.1% polyvinylpyrrolidone-iodine (PVP-I, Sigma,  
5 St. Louis, MO) for 2 min, washed three times in sterile embryo medium (EM), soaked in  
6 0.003% bleach for 10 minutes, then washed in sterile EM. Subsequently, 15 GF  
7 embryos were transferred to sterile tissue culture flasks (25 cm<sup>2</sup>, Techno Plastic  
8 Products, Trasadingen, Switzerland) with 15-mL sterile EM. Sterility of GF flasks was  
9 confirmed visually using phase optics on a 40x magnification and by culturing. Control  
10 conventionalized (CVZ) fish were prepared GF, as above, and inoculated with 1 mL of  
11 non-sterile conventional embryo media (EM) on 4 dpf. Inoculating flasks containing 4 dpf  
12 GF zebrafish with 10<sup>6</sup> CFU/mL of each bacterial strain generated mono-, di-, or tri-  
13 associated zebrafish. All manipulations to the GF flasks were performed under a class II  
14 A/B3 biological safety cabinet. The flasks were kept at 28° C until analysis of fluorescent  
15 cells on 6 dpf. Zebrafish were anesthetized in Tricaine (Stock 4g/L, Western Chemical,  
16 Inc., Ferndale, WA). Zebrafish intestines were dissected using sterile dissecting needles.  
17 The fish was oriented with the intestinal bulb towards the right. One dissecting needle  
18 was placed above and to the left of the intestinal bulb; the second needle was placed on  
19 the fish to hold it in place. Subsequently, the needle placed by the bulb was pulled to the  
20 right, dislodging the bulb from the esophageal-intestinal junction. Then the entire  
21 intestine was pulled out of the fish. Intestines that were torn in the process were not  
22 included in colonization analysis.

23

24 *Microbiology*

25 From freezer stocks, the bacterial isolates were grown aerobically on tryptic soy agar  
26 (TSA, BD, Sparks, MD) at 30° C. For fish inoculations these strains were grown shaking,

27 aerobically in tryptic soy broth (TSB, BD, Sparks MD) over night at 30° C, then diluted in  
28 sterile EM before inoculation.

29

### 30 *Prednisolone treatments*

31 The prednisolone solution was prepared by dissolving 6 $\alpha$ -methylprednisolone (Sigma,  
32 St. Louis, MO) in di-methyl sulfoxide (DMSO, Fisher, Fair Lawn, NJ) and filter sterilizing  
33 (DMSO-safe, Fisher Scientific, Waltham, MA). Gnotobiotic zebrafish were treated with a  
34 final concentration of 25 ug/ml. A DMSO-only vehicle control was included in all  
35 prednisolone experiments.

36

### 37 *Microbiota quantification*

38 To determine the CFU/intestine, dissected zebrafish intestines were placed in 100- $\mu$ l  
39 sterile EM. Each gut was homogenized with a cordless pestle motor (VWR) and a sterile  
40 disposable pestle (VWR) for 30 seconds. Samples were subsequently diluted, and  
41 cultured on TSA (BD, Sparks MD). The TSA plates were incubated aerobically at 30° C  
42 overnight and then colonies were counted.

43

### 44 *Concentration of cell-free supernatant*

45 *Shewanella* was grown over night shaking in TSB. Then 1 ml of the overnight culture  
46 was used to inoculate a 50-ml culture, which was kept shaking at 30° C for 2 h. To  
47 prepare the CFS, the 50-mL cultures were centrifuged at 7000  $\times$  g for 10 min at 4° C.  
48 Subsequently, the supernatant was filtered through a 0.22- $\mu$ m sterile tube top filter  
49 (Corning Inc., Corning, NY). The sterile supernatant was concentrated at 4° C for 1 h at  
50 3000  $\times$  g with a centrifugal device that has a 10-kDa weight cut off (Pall Life Sciences,

51 Ann Arbor, MI). The concentration of the supernatant was determined with a Nanodrop  
52 and inoculated into the flasks at a final concentration of 500 ng/mL.

53

#### 54 *In vitro co-culture assay*

55 *Vibrio* and *Aeromonas* were grown overnight shaking in TSB (BD, Sparks, MD).  $5 \times 10^8$   
56 bacterial cells of each strain were mixed together and brought up to a volume of 1 ml  
57 with sterile TSB. A co-culture of an isogenic fluorescently tagged strain with the wild-type  
58 counterpart served as controls. The homogenate was diluted and plated to obtain the  
59 starting ratio of the two bacterial strains. The bacterial mixture was centrifuged for 2 min  
60 at  $7000 \times g$  and re-suspended in 30  $\mu$ L brain heart infusion media (BHI, BD, Sparks,  
61 MD). This re-suspension was spotted directly on sterile 0.46- $\mu$ m filter paper (Millipore,  
62 Darmstadt, Germany) that had been placed directly on a BHI-agar plate. We also  
63 performed these assays on TSA plates but saw a smaller effect. Plates were incubated  
64 for 24 h at 30° C. Bacterial spots were harvested and the CFU/mL of surviving bacteria  
65 was measured by serial dilution and plating.

66

#### 67 *Modeling bacteria-neutrophil interactions*

68 We describe a model of bacteria and neutrophil populations dynamics, motivated by the  
69 experiments described in the main text. In general, the possible interactions between  
70 two bacterial species, for example *Vibrio* and *Shewanella*, can be depicted as in Figure  
71 S4A. Interactions can be positive or negative. Our goal is a very simple, lowest-order  
72 model that parameterizes key aspects of bacterial growth, neutrophil influx, and  
73 interactions between two bacterial components and neutrophils with a minimal number  
74 of parameters, to avoid over-fitting. Moreover, the model described below helps  
75 determine whether additive interactions between species' effects are capable of



76 reproducing observed phenomena. Of course, more complex interactions may exist in  
77 reality, which could be uncovered in future experiments.

78 With *no interactions* between neutrophils and bacteria, but interactions between  
79 two bacterial species  $i$  and  $j$ , let us consider this model:

80 (1) 
$$\frac{dP_i}{dt} = r_i P_i \left(1 - \frac{P_i + \gamma_{ij} P_j}{K_i}\right)$$

81 (2) 
$$\frac{dN}{dt} = \alpha_N - k_N N$$

82 Here,  $i$  and  $j$  label the bacterial species (e.g. *Vibrio* and *Shewanella*),  $P_i$  is the population  
83 of species  $i$ ,  $N$  is the number of neutrophils, and the other symbols are defined below. All  
84 the  $P_i$ , as well as  $N$ , are constrained to be non-negative. The first equation represents  
85 Lotka-Volterra dynamics for two interactions species, while the second is a linear model  
86 of neutrophil flux. There are several parameters:  $r_i$ , the growth rate of species  $i$ ;  $K_i$ , the  
87 carrying capacity of species  $i$ ;  $\gamma_{ij}$ , parameters characterizing interactions, specifically the  
88 influence of species  $j$  on species  $i$ ;  $\alpha_N$ , the influx rate of neutrophils;  $k_N$ , the exit rate of  
89 neutrophils. At steady state, the number of neutrophils is clearly  $N = \alpha_N / k_N$ .

90 Now let's introduce *interactions* between neutrophils and bacteria. Bacterial  
91 might influence the influx (or exit) of neutrophils, and neutrophils might influence  
92 bacterial growth rates. The latter could be represented by:

93 (3) 
$$\frac{dP_i}{dt} = r_i P_i \left(1 - \frac{P_i + \gamma_{ij} P_j - b_i N}{K_i}\right)$$

94 Introducing new parameters  $b_i$ . Considering terms like this, we find reasonable  
95 agreement with the data only for  $b \approx 0$  (not shown). Moreover, since we are looking to  
96 see whether a minimal model is sufficient to describe the data, will ignore these  
97 neutrophil  $\rightarrow$  bacteria interactions. Let us consider bacteria  $\rightarrow$  neutrophil interactions by  
98 replacing equation 2 with:

99 (4) 
$$\frac{dN}{dt} = \alpha_N - k_N N + \sum_i \alpha_i(P_i)$$

100 Where  $\alpha_i(P_i)$  characterizes the effect of species  $i$  on neutrophil influx. The influence of  
 101 bacteria on neutrophils is given by an influx-like term. Importantly, in this model, the two  
 102 extra influx terms are simply additive. We choose the form of the influx functions to be  
 103 linear in the logarithm of bacterial populations, mimicking the observations of bacterial  
 104 mono-association data (Fig. 1). We will discuss a model in which the neutrophil  
 105 response is a sigmoidal function of the logarithm of the population, which leads to very  
 106 similar conclusions.

107 For *Vibrio* (V), *Shewanella* (S), and *Aeromonas* (A), we have equations 5, 6, and  
 108 7:

$$\alpha_V(P_V) = \begin{cases} M_V \log_{10} \frac{P_V}{T_V} & \text{if } P_V > T_V \\ 0 & \text{otherwise} \end{cases}$$

109 
$$\alpha_S(P_S) = M_S \log_{10} \frac{P_S}{T_S}$$

$$\alpha_A(P_A) = M_A \log_{10} \frac{P_A}{T_A}$$

110 For *Vibrio*, the data do not suggest any accessible regime with suppression of neutrophil  
 111 number—the slope is steep and the neutrophil counts are almost always above the  
 112 germ-free value,  $\approx 3.5$  (Fig. 1). Therefore,  $T_V$  is a sharp population threshold for the  
 113 species' influence on neutrophils. For *Shewanella*,  $\alpha_S(P_S)$  can be positive or negative,  
 114 depending on whether the population is above or below  $T_S$ ; the data imply that the  
 115 neutrophil interaction can be positive or negative, since the neutrophil counts lie above  
 116 and below the germ-free value. Of course, the above form must fail to describe the  
 117 system for low  $P_S$ , since it does not approach the germ-free neutrophil abundance as  $P_S$   
 118  $\rightarrow 0$ . We would expect the slopes  $M_V$ ,  $M_S$ , and  $M_A$  to be positive, negative, and near

119 zero, respectively, given the data; this will be assessed more rigorously below.

120 **Equations 1 and 4-7 define our model.** Some of its properties can be assessed simply  
121 by inspection. For others we numerically integrate these differential equations, starting  
122 from initial populations  $P_i = 10$  bacteria and  $N = 3.5$  neutrophils, over a span of 48 hours  
123 using programs written in MATLAB that make use of MATLAB's "ode45" numerical  
124 integration function. In all cases, the system reaches a steady state within this interval.

125 Incorporating interactions has added new parameters to the model:  $M_i$ ,  
126 magnitude of the influence of species  $i$  on the influx rate of neutrophils;  $T_i$ , characteristic  
127 population (or threshold) for the influence of species  $i$  on the influx rate of neutrophils. In  
128 total, the model has 12 parameters for two species. Some of these parameters are  
129 "uninteresting"—the growth rates ( $r$ ) and carrying capacities ( $K$ ), for example, which set  
130 overall timescales and population scales. The neutrophil parameters  $\alpha_N$  and  $k_N$  only  
131 influence the background level of neutrophils by their ratio. Also, given the observed  
132 data, we can state  $\gamma_{VS} \approx 0$  (i.e. the influence of *Shewanella* on *Vibrio* growth is  
133 negligible); similarly,  $\gamma_{VA} \approx 0$ . All this leaves us with only five "interesting" parameters for  
134 a *Vibrio-Shewanella* di-association:  $\gamma_{SV}$ ,  $M_V$ ,  $M_S$ ,  $T_V$ , and  $T_S$ ; there is a similar set for  
135 *Vibrio-Aeromonas* (Fig. S4B).

136 Growth rates for the various bacterial species in the larval zebrafish gut are  
137 known experimentally. For each (*Vibrio*, *Aeromonas*, and *Shewanella*),  $r \approx 0.9/\text{hr}$ . From  
138 mono-association data, the maximum number of bacteria observed provides an estimate  
139 of the carrying capacities:  $K_V \approx 1 \times 10^5$ ,  $K_S \approx 1 \times 10^{4.2}$ ,  $K_A \approx 1 \times 10^{4.6}$ . The mean number  
140 of neutrophils in germ-free fish  $\approx 3.5$ , sets  $\alpha_N/k_N = 3.5$ . In simulations, we arbitrarily set  
141  $\alpha_N = 0.7$  1/hr,  $k_N = 0.2$  1/hr; note that only the ratio matters in the steady state.

142 We can use the *Vibrio* mono-association data (Fig. 1D) to determine reasonable  
143 values for  $M_V$  and  $T_V$ . Given the experiment duration, growth rates, and carrying

144 capacity, the bacterial population will reach carrying capacity well before the  
145 experimental count of neutrophil number is made (i.e. we will observe the steady-state  
146 neutrophil number). Since  $dN/dt = 0$ , it follows from Eq. 4-5 that  $N$  is a simple linear  
147 function of  $\log(P_V)$  for  $P_V > T_V$ :

148 (8) 
$$N = \frac{1}{k_N} (\alpha_N + M_V (\log_{10}(P_V / T_V)))$$

149 This form is consistent with the mono-association data (Fig. 1D), which we can fit with a  
150 simple linear regression to determine the parameters. (We fit  $N$  vs.  $\log(\text{CFU})$  with a  
151 simple least-squares minimization, i.e. assuming Gaussian noise; the data don't support  
152 anything more complicated.) This gives  $M_V = 1.7 \pm 0.6$  1/hr, and a threshold value of  $T_V$   
153  $= 3.9 \pm 0.2$ . We can use the bacterial population data from the *Vibrio* and *Shewanella* di-  
154 association to set  $\gamma_{SV}$ . Noting that with *Vibrio* present, the *Shewanella* population is  
155 reduced by a factor of 0.2 relative to *Shewanella* mono-association, we can simulate  
156 Equations 1 and 4-7, varying  $K_V$  and fixing  $K_S = 0.1K_V$ , for various  $\gamma_{SV}$  to determine the  
157 value at which  $P_S$  is reduced by 0.2× relative to  $\gamma_{SV} = 0$ . This gives  $\gamma_{SV} \approx 0.08 \pm 0.01$ .  
158 In principle, we could use the same approach as with the *Vibrio* mono-association data  
159 to extract  $M_S$  and  $T_S$  from the *Shewanella* mono-association data. Then, with all  
160 parameters fixed, we could simulate the di-association experiments and examine the  
161 predicted neutrophil abundance. However, the data are too noisy to do this with high  
162 confidence. We can see this by plotting the goodness of fit ( $\chi^2$ ) contours for Equation 6  
163 applied to the *Shewanella* mono-association data as a function of  $M_S$  and  $T_S$  (Fig. S4C).  
164 The range over which  $\chi^2$  goes to +2.3 from its minimal value, i.e. the 68% confidence  
165 interval, is large. We instead take a different approach, examining ranges of  $M_S$  and  $T_S$ ,  
166 simulating the resulting di-association behavior, and comparing to experimental  
167 observations. We denote as  $\zeta_{VS}$  the factor by which the neutrophil number in the *Vibrio*-

168 *Shewanella* di-associations differs from the neutrophil number for *Vibrio* mono-  
169 associations. Figure S4D shows  $\zeta_{VS}$  as a function of  $M_S$  and  $T_S$ , calculated from the  
170 simulations as the number of neutrophils at 48 h divided by the value for  $M_S = 0$ . Note  
171 that these predicted neutrophil abundances do not account for uncertainties in the  
172 parameters  $M_V$ ,  $T_V$ , etc., and so the contours are actually “fuzzier” than shown.  
173 Experimentally,  $\zeta_{VS} \approx 0.8 \pm 0.2$  (Fig. 4B). Does the region of the parameter space for  
174 which the model would give  $\zeta_{VS} \approx 0.8 \pm 0.2$  (Fig. S4D) intersect the (large) confidence  
175 interval inferred from the mono-association data (Fig. 4)? Yes (Fig. S4E). We can  
176 therefore conclude that this simple additive model of bacteria-neutrophil interactions is  
177 consistent with the observed data. With parameters  $M_V = 1.2$  1/hr,  $T_V = 3.9$ ,  $\gamma_{SV} = 0.08$ ,  
178  $M_S = -0.75$ , and  $T_S = 2.75$ , i.e. well inside the confidence interval for these parameters,  
179 the time-series implied by the model are shown in Figure S4F. It is interesting to note the  
180 non-monotonicity of the neutrophil response, which follows from the different effective  
181 thresholds of the two species' effects on neutrophil dynamics.

182 We can similarly examine the *Vibrio-Aeromonas* di-association data. As we  
183 would expect from the mono-association data (Fig. 1), the slope parameter  $M_A$  is  
184 moderately well constrained, but  $T_A$  is not. Again, we can consider the confidence  
185 interval (Fig. S4G). The 68% confidence interval is quite large; the threshold  $T_A$  is not at  
186 all well constrained, since the slope  $M_A$  is quite flat. Note also that behavior at low  
187 bacterial abundance is not properly accounted for in this model: at low  $P_A$ , the neutrophil  
188 number should drop to the germ-free level, which is not accounted for in the fit, and  
189 which would push  $M_A$  to a tighter band around 0.4. Examining the  $\approx 10\times$  suppression of  
190 the *Aeromonas* population by *Vibrio* and the  $\approx 3\times$  enhancement of the *Vibrio* population  
191 in di-associations relative to its mono-association value lets us set the interaction terms  
192  $\gamma_{AV} \approx 0.08$  and  $\gamma_{VA} \approx -50$ . The observed number of neutrophils for the *Vibrio-Aeromonas*

193 di-association is about twice that of the *Vibrio* mono-association ( $11.8 \pm 5.2$  vs.  $6.2 \pm$   
 194  $4.8$ ), so  $\xi_{VA} \approx 1.9 \pm 0.3$ . The  $\xi_{VA}$  predicted by the model as a function of  $M_A$  and  $T_A$  are  
 195 shown in Figure S4H. Again,  $\chi^2$  contours do not account for the large uncertainties in  $\gamma_{AV}$   
 196 and other parameters, and so should be considered “fuzzier” than they appear. As with  
 197 the *Shewanella* parameters, we can consider the  $M_A / T_A$  parameter space for regions  
 198 that would fit both the mono-association and di-association data (Fig. S4I). Again, there  
 199 is considerable overlap, indicating that this simple additive model of bacteria-neutrophil  
 200 interactions is sufficient to describe the *Aeromonas-Vibrio* data as well as the  
 201 *Shewanella-Vibrio* data.

202 As noted, we model the influence of bacteria on neutrophil number with a  
 203 logarithmic relationship, i.e. treating the neutrophil influx as a linear function of the  
 204 logarithm of the bacterial abundance. In reality, the neutrophil population is of course  
 205 bounded from above, which would motivate using a bounded fitting function such as a  
 206 sigmoidal curve. However, the data do not span a range that shows the saturation of  
 207 neutrophil number with increasing bacterial population, so fitting a sigmoid leaves the  
 208 saturation parameter highly unconstrained. A sigmoidal fit therefore introduces an  
 209 unwarranted extra degree of freedom. Nonetheless, to see if it alters any of our  
 210 conclusions, we have fit the neutrophil (MPX+) vs. bacteria (CFU) data to a sigmoid. In  
 211 brief, it does not. We can compare the original model, equations 9 and 10, (in which  
 212 MPX+ number varies linearly with  $\log(\text{CFU})$ ):

$$\alpha_i(P_i) = M_i \log_{10} \frac{P_i}{T_i}$$

$$N = \frac{1}{k_N} (\alpha_N + \alpha_i(P_i))$$

214 with a sigmoidal model (equations 11 and 12):

$$\alpha_i(P_i) = -\alpha_N + \frac{S_i}{1 + \exp(-M_i \log_{10} \frac{P_i}{T_i})}$$

$$N = \frac{1}{k_N}(\alpha_N + \alpha_i(P_i))$$

215

216 The sigmoidal model adds a new parameter, the saturation value  $S_i$ , and it is  
 217 constructed such that its limits are 0 and  $S_i$ . The parameters  $M_i$  and  $T_i$  have the same  
 218 physical interpretations as in the earlier model:  $M_i$  describes steepness of the curve, and  
 219  $T_i$  is like a population offset. We illustrate the results of fits to each model (linear-  
 220 logarithmic and sigmoidal-logarithmic) for *Vibrio* and *Shewanella* mono-association data  
 221 (Fig. S4J). Unsurprisingly, the both models perform similarly in fitting the data, and the  
 222 uncertainty in the  $S_i$  parameter is enormous (over 100% for the *Vibrio* dataset, and about  
 223 50% for *Shewanella*). One can use the sigmoidal model to predict di-association  
 224 behavior for both *Vibrio* + *Shewanella* and *Vibrio* + *Aeromonas*, as was done above for  
 225 the linear model. Again, the predicted neutrophil abundance is consistent with an  
 226 additive response, but with even larger confidence intervals (Fig. S4K; the sigmoid-  
 227 model analog of Figure S4E). The available data place only weak constraints on  
 228 particular functional forms for the neutrophil response. The linear model (linear in  
 229  $\log(\text{CFU})$ ) has the virtue of simplicity, with only two relevant parameters, but a deeper  
 230 understanding of the exact dependence of the immune response on bacterial abundance  
 231 must await the development of more precise methods.

232 A simple additive model of bacteria-neutrophil interactions, in which bacteria  
 233 abundance enhances or suppresses the neutrophil influx rate, is sufficient to explain the  
 234 neutrophil abundance in di-associations based on parameters largely determined from  
 235 mono-association experiments. This applies to both the *Vibrio-Shewanella* di-association  
 236 and the *Vibrio-Aeromonas* di-association. We note that it is of course conceivable that  
 237 non-additive interactions among bacteria also exist. It is also certainly possible that

238 neutrophils can influence bacterial growth rates. With the present data, invoking these  
239 and other more complex mechanisms is unwarranted, but these represent fascinating  
240 areas of future investigation. It is interesting to notice that this simple model predicts  
241 non-monotonic changes in neutrophil abundance over time, due to different effective  
242 population “thresholds” for effects on neutrophils by different bacterial species. This may  
243 be observable in live imaging experiments, though large numbers of specimens would  
244 likely be needed for statistically meaningful outcomes.

245           The sufficiency of the simple model presented here suggests that understanding  
246 bacteria-derived factors that influence neutrophil dynamics may be sufficient to predict  
247 their effects on complex, multi-species communities, since impacts on innate immune  
248 response may be roughly additive with respect to species.

249

250

251

252

253
